# Supplementary material
Source: HighWire-hosted journal article supplement (https://www.cmajopen.ca/highwire/filestream/88139/field_highwire_adjunct_files/1/2021-0068-2-at.pdf)
Supplement: 2021-0068-2-at.pdf [file 2021-0068-2-at.pdf]

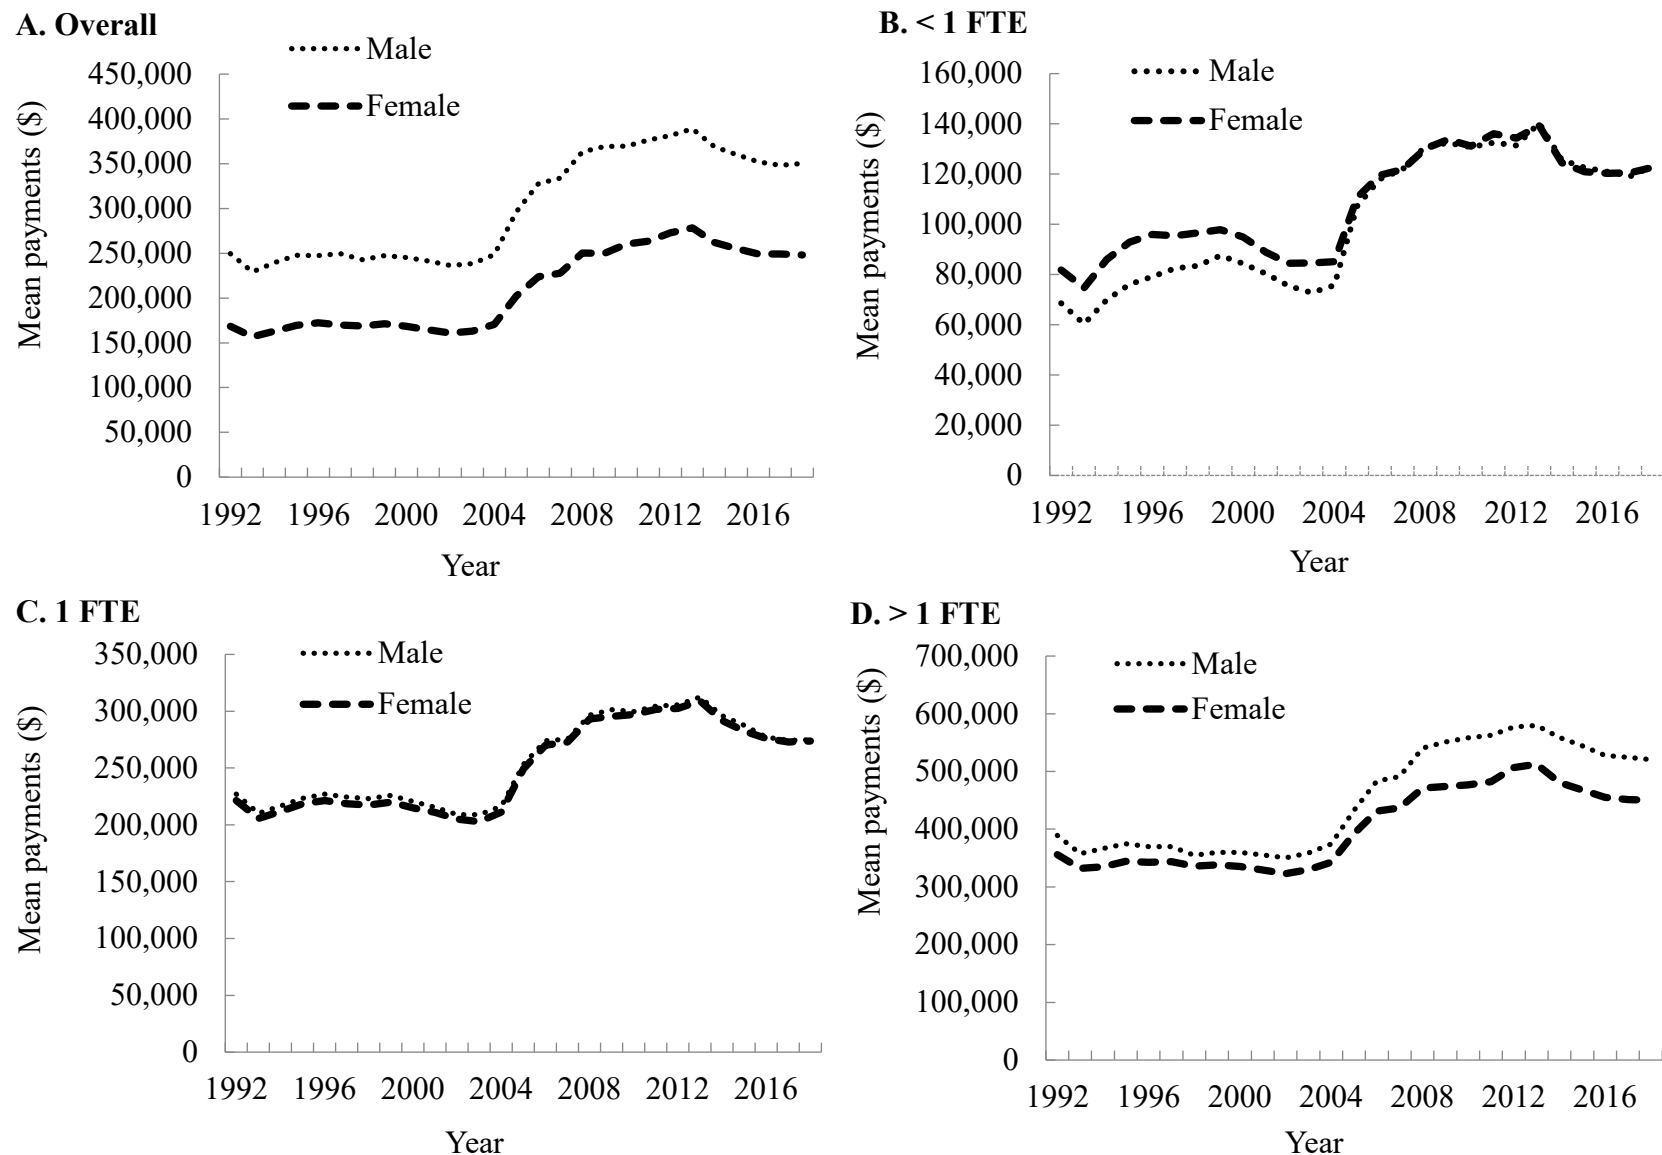

Supplementary Figure 2. Mean payment of family physicians in Ontario, Canada from 1992 to 2018 by year, sex and full-time equivalent (FTE). A. Overall. B. <1 FTE. C. 1 FTE. D. >1 FTE
